kinase muscle and brain isoenzyme measurement after noncardiac surgery: A systematic review and meta-analysis. *ANESTHESIOLOGY* 2011; 114:796–6

9. VISION Writing Group, VISION Investigators: Myocardial injury after noncardiac surgery: A large, international, prospective cohort study establishing diagnostic criteria, characteristics, predictors, and 30-day outcomes. *ANESTHESIOLOGY* 2014; 120:564–78
10. Vascular Events In Noncardiac Surgery Patients Cohort Evaluation Study I, Devereaux PJ, Chan MT, Alonso-Coello P, Walsh M, Berwanger O, Villar JC, Wang CY, Garutti RI, Jacka MJ, Sigamani A, Srinathan S, Biccari BM, Chow CK, Abraham V, Tiboni M, Pettit S, Szczeklik W, Lurati Buse G, Botto F, Guyatt G, Heels-Ansdell D, Sessler DI, Thorlund K, Garg AX, Mrkobrada M, Thomas S, Rodseth RN, Pearse RM, Thabane L, McQueen MJ, VanHelder T, Bhandari M, Bosch J, Kurz A, Polanczyk C, Malaga G, Nagele P, Le Manach Y, Leuwer M, Yusuf S: Association between postoperative troponin levels and 30-day mortality among patients undergoing noncardiac surgery. *JAMA* 2012; 307:2295–304
11. Bartels K, Karhausen J, Clambey ET, Grenz A, Eltzschig HK: Perioperative organ injury. *ANESTHESIOLOGY* 2013; 119: 1474–89
12. Devereaux PJ, Xavier D, Pogue J, Guyatt G, Sigamani A, Garutti I, Leslie K, Rao-Melacini P, Chrolavicius S, Yang H, Macdonald C, Avezum A, Lanthier L, Hu W, Yusuf S: Characteristics and short-term prognosis of perioperative myocardial infarction in patients undergoing noncardiac surgery: A cohort study. *Ann Intern Med* 2011; 154:523–8
13. Semel ME, Lipsitz SR, Funk LM, Bader AM, Weiser TG, Gawande AA: Rates and patterns of death after surgery in the United States, 1996 and 2006. *Surgery* 2012; 151:171–82

## ANESTHESIOLOGY REFLECTIONS FROM THE WOOD LIBRARY-MUSEUM

### Longnecker's Trade Card against the "Asphyxie" of "The Old Way"

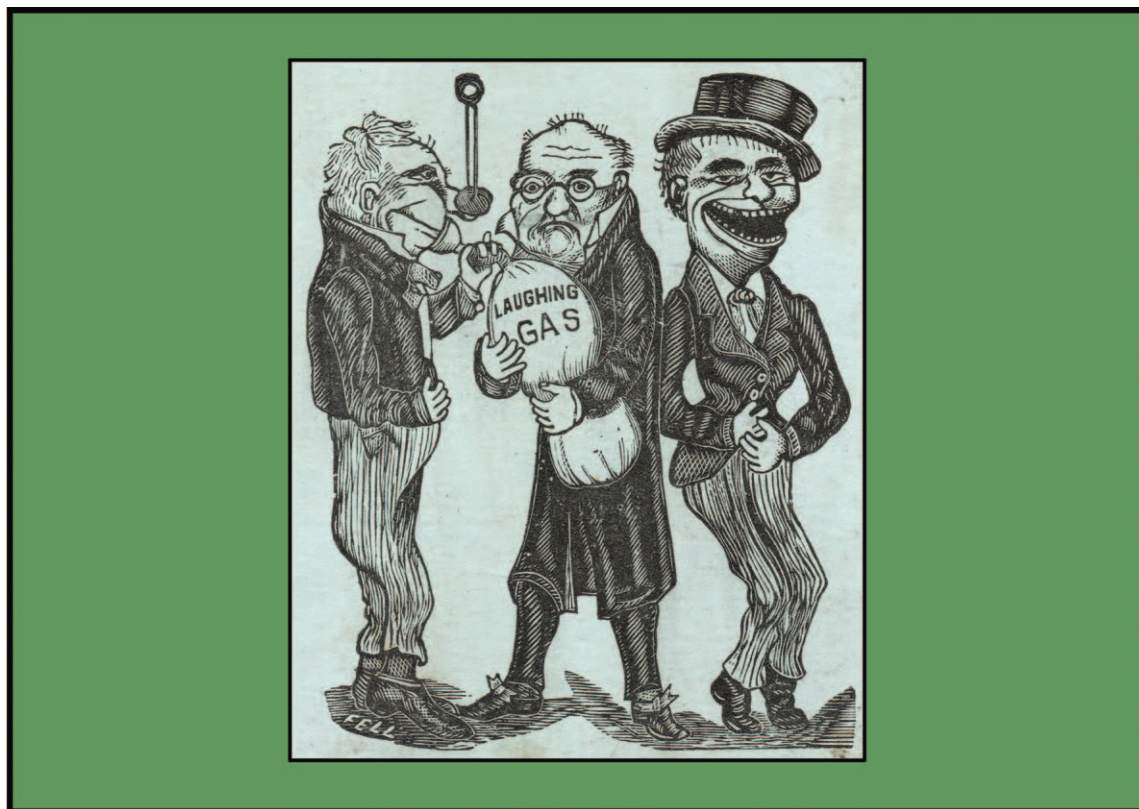

In decrying "The Old Way" of nearly asphyxiating patients with brief administrations of 100% nitrous oxide, dentist F. C. Longnecker advertised images of a patient before and after receiving laughing gas via a mouthpiece from a large bag (above). According to Dr. Longnecker:

*With your fingers your nose compress,  
The real natural place of breath,  
Then by swallowing, you will see  
The cause of so much "asphyxie" [sic]  
Now laid to my pure gas  
With this nose compress and thermometer too,  
You will always know how much will do.*

This trade card is part of the Wood Library-Museum's Ben Z. Swanson Collection. (Copyright © the American Society of Anesthesiologists, Inc.)

George S. Bause, M.D., M.P.H., Honorary Curator, ASA's Wood Library-Museum of Anesthesiology, Park Ridge, Illinois, and Clinical Associate Professor, Case Western Reserve University, Cleveland, Ohio. [UJYC@aol.com](mailto:UJYC@aol.com).
